# Supplementary material for: Polymorphism of amyloid β peptide in different environments: implications for membrane insertion and pore formation
Source: Royal Society of Chemistry journal article supplement (doi:10.1039/c1sm05162h), 2011-01-01
Supplement: c1sm05162h.pdf [file c1sm05162h.pdf]

## Electronic supplementary information

# Polymorphism of amyloid $\beta$ peptide in different environments: implications for membrane insertion and pore formation†

Fernando Terán Arce<sup>a,1</sup>, Hyunbum Jang<sup>b,1</sup>, Srinivasan Ramachandran<sup>a</sup>,  
Preston B. Landon<sup>a</sup>, Ruth Nussinov<sup>b,c\*</sup>, Ratnesh Lal<sup>a\*</sup>

<sup>a</sup>*Department of Bioengineering and Department of Mechanical and Aerospace Engineering, University of California, San Diego, La Jolla, CA 92093, U.S.A.*

<sup>b</sup>*Center for Cancer Research Nanobiology Program, SAIC-Frederick, Inc., NCI-Frederick, Frederick, Maryland 21702, U.S.A.*

<sup>c</sup>*Sackler Inst. of Molecular Medicine, Department of Human Genetics and Molecular Medicine, Sackler School of Medicine, Tel Aviv University, Tel Aviv 69978, Israel*

### \* Corresponding authors:

**Ratnesh Lal**, Departments of Bioengineering and Mechanical & Aerospace Engineering, University of California, San Diego, PFBH Room 219, 9500 Gilman Drive, MC 0412, La Jolla, CA 92093-0412, Tel: 858-822-0384/858-534-5681, email: [rlal@ucsd.edu](mailto:rlal@ucsd.edu)

**Ruth Nussinov**, Center for Cancer Research Nanobiology Program, NCI-Frederick, SAIC-Frederick, Inc., Frederick, Maryland 21702, U.S.A.; Tel: 301-846-5579; Fax: 301-846-5598; E-mail: [ruthnu@helix.nih.gov](mailto:ruthnu@helix.nih.gov)

<sup>1</sup> These authors contributed equally to this work

## Supplementary Figures

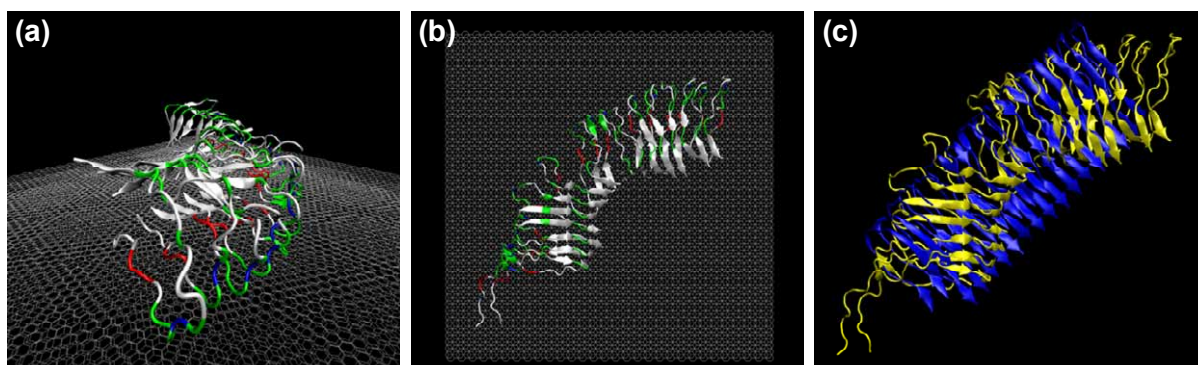

**Figure S1.** An additional simulation for the p3 fibril with the polar/hydrophilic N-terminal facing the graphite surface. Snapshots of the 16-mer p3 fibril on the surface of HOPG at the end of the 50 ns simulation in the (a) perspective and (b) top views. In the peptides, hydrophobic residues are shown in white, polar and Gly residues in green, negatively charged residues in red, and positively charged residues in blue. (c) Superposition of the p3 fibril conformations on the surface of HOPG from the starting points (blue) and the 50 ns simulation (yellow).

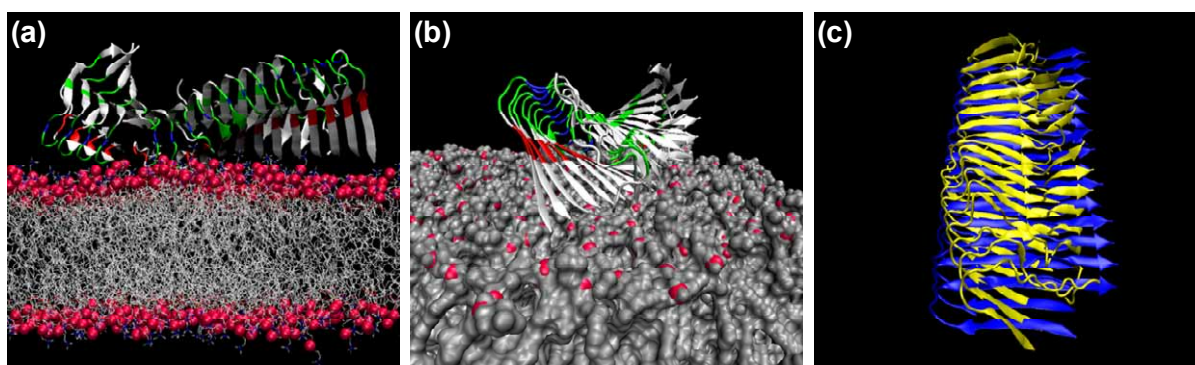

**Figure S2.** An additional simulation for the p3 fibril with the polar/hydrophilic N-terminal facing the DOPC bilayer surface. Snapshots of 16-mer p3 fibril on the surface of DOPC bilayer taken from the 50 ns simulation in the (a) lateral and (b) perspective views. In the peptides, hydrophobic residues are shown in white, polar and Gly residues are shown in green, negatively charged residues in red, and positively charged residues in blue. In the lipids in (a), nitrogen atoms are shown in red, carbon chains are represented as white threads, and phosphate atoms are shown as red spheres. In the perspective view, the gray surface represents the DOPC bilayer. (c) Superposition of the p3 fibril conformations on the surface of DOPC bilayer from the starting point (blue) and the 50 ns simulation (yellow).

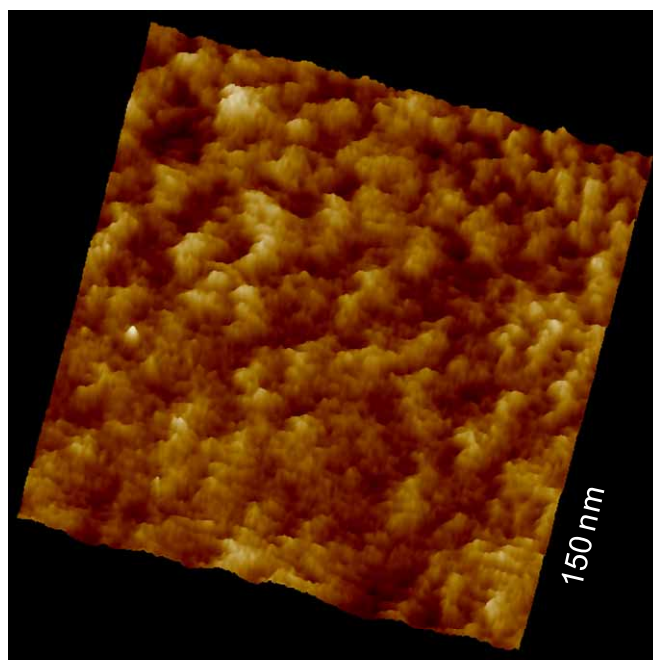

**Figure S3.** AFM image of globular p3 oligomers on the surface of DOPC bilayer.
